# Supplementary material for: Classification of large-scale environments that drive the formation of mesoscale convective systems over southern West Africa
Source: Copernicus journal article supplement (doi:10.5194/wcd-4-773-2023), 2023-09-06
Supplement: Supplementary file 1 [file wcd-4-773-2023-supplement.pdf]

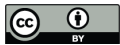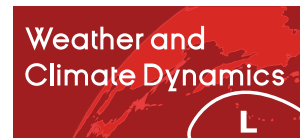

Open Access

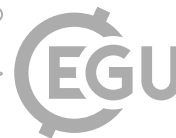

*Supplement of*

## **Classification of large-scale environments that drive the formation of mesoscale convective systems over southern West Africa**

**Francis Nkrumah et al.**

*Correspondence to:* Francis Nkrumah ([francis.nkrumah@ucc.edu.gh](mailto:francis.nkrumah@ucc.edu.gh)) and Nana Ama Browne Klutse ([nklutse@ug.edu.gh](mailto:nklutse@ug.edu.gh))

The copyright of individual parts of the supplement might differ from the article licence.

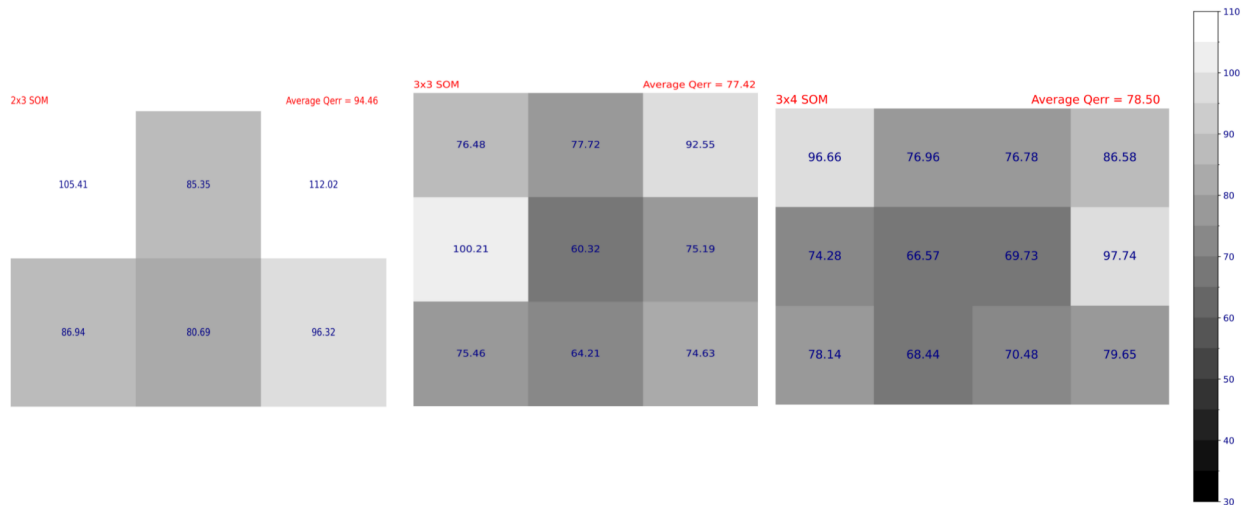

**Figure. S1.** Total quantization error (gpm) of all grid points in the geopotential height patterns mapped to each SOM node.

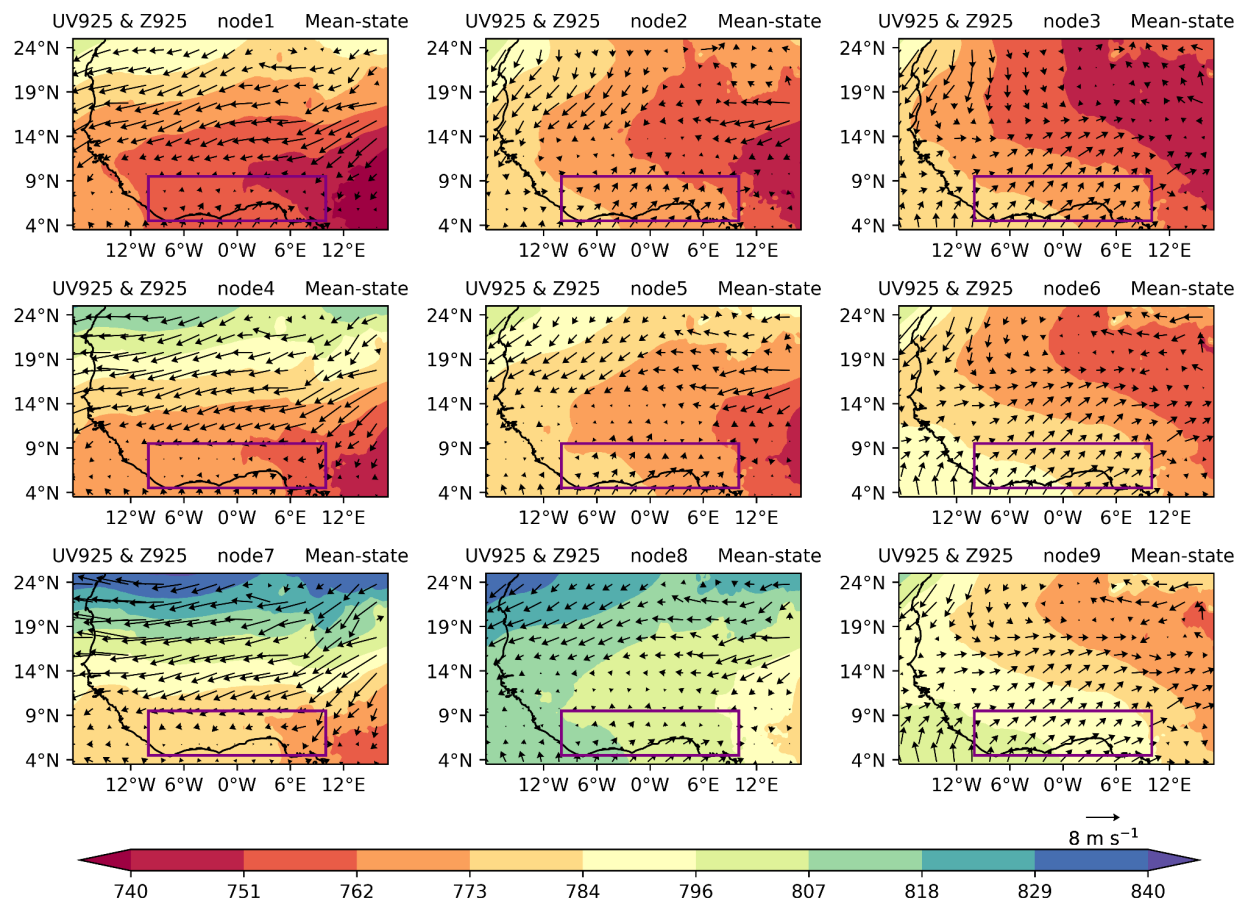

**Figure. S2.** 12 UTC composites of 925-hPa geopotential height (shading; gpm) and 925-hPa winds (vectors;  $\text{m s}^{-1}$ ) in 9 nodes based on SOM analysis. The purple box depicts the SWA region (5°–9°N, 10°W–10°E)

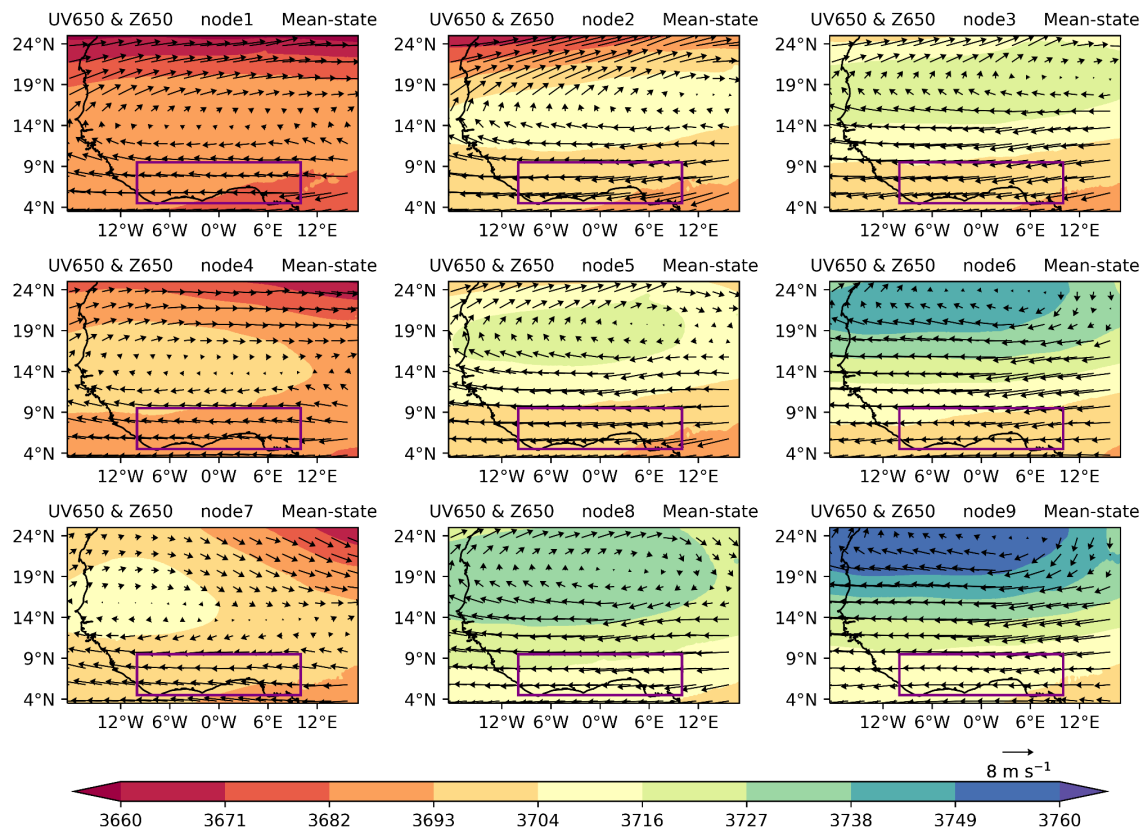

**Figure. S3.** 12 UTC composites of 650-hPa geopotential height (shading; gpm) and 650-hPa winds (vectors;  $\text{m s}^{-1}$ ) in 9 nodes based on SOM analysis. The purple box depicts the SWA region (5°–9°N, 10°W–10°E)

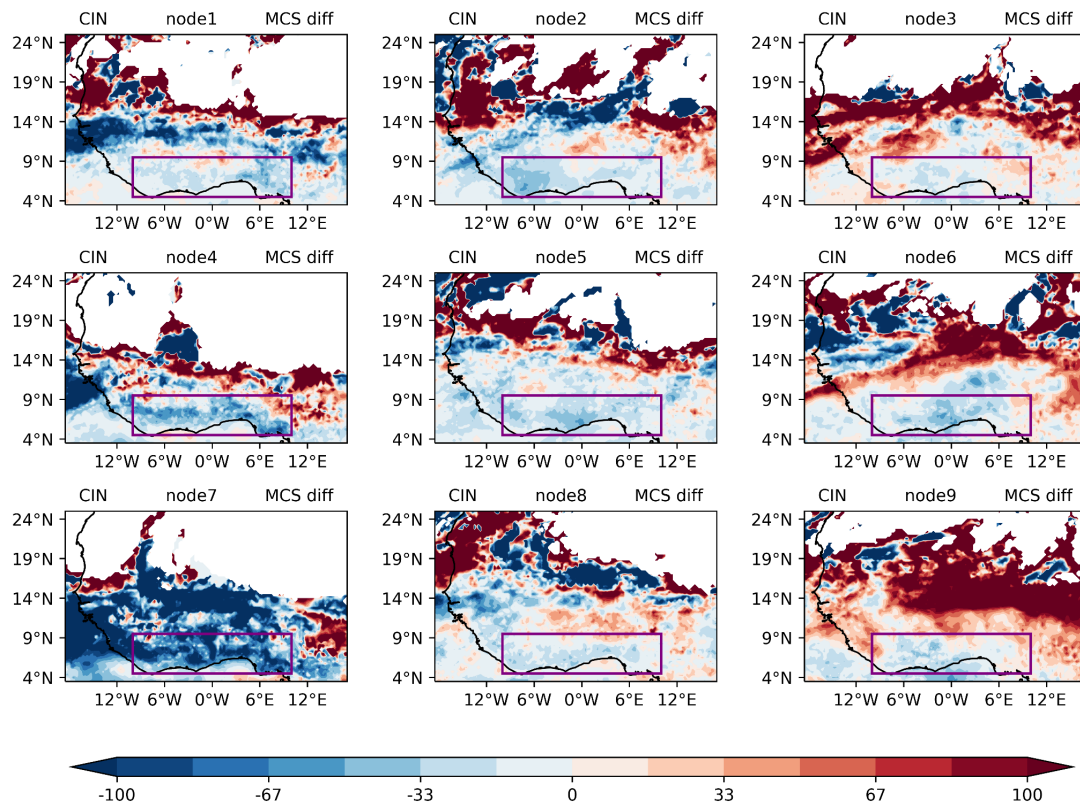

**Figure. S4.** 12 UTC composite anomalies of CIN for MCSs occurring in each type of large-scale environment determined by the SOM analysis over SWA. CIN anomalies are shown when they are significant at the 5% level.

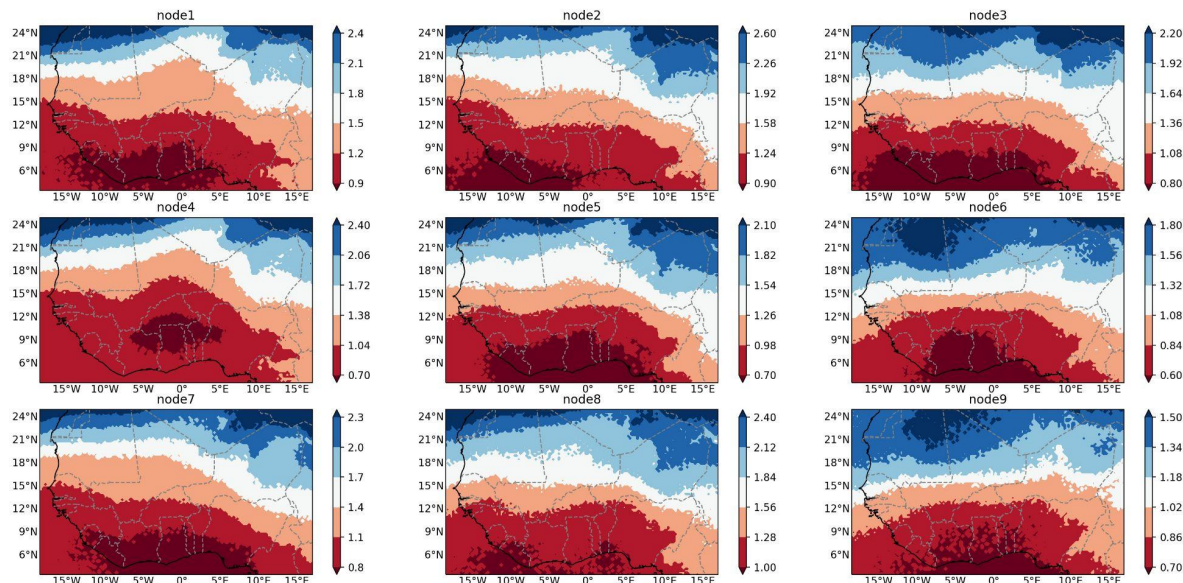

**Figure. S5.** 12 UTC 925-hPa geopotential height 95% confidence interval widths (shading; gpm) based on bootstrapping with 5000 resamples for the 9 node day groups based on the SOM analysis.
